# Supplementary material for: In situ TEM observation of the vapor–solid–solid growth of <001> InAs nanowires
Source: Royal Society of Chemistry journal article supplement (doi:10.1039/d0nr02892d), 2020-01-01
Supplement: d0nr02892d1.pdf [file d0nr02892d1.pdf]

## Electronic Supplementary Information

### ***In situ* TEM observation of the vapour-solid-solid growth of $\langle 00\bar{1} \rangle$**

#### **InAs nanowires**

Qiang Sun,<sup>a</sup> Dong Pan,<sup>c</sup> Meng Li,<sup>a</sup> Jianhua Zhao,<sup>c</sup> Pingping Chen,<sup>d</sup> Wei Lu,<sup>d</sup> and Jin Zou <sup>\*a,b</sup>

<sup>a</sup> Materials Engineering, The University of Queensland, St. Lucia, Queensland 4072, Australia. \*Email: j.zou@uq.edu.au

<sup>b</sup> Centre for Microscopy and Microanalysis, The University of Queensland, St. Lucia, Queensland 4072, Australia.

<sup>c</sup> State Key Laboratory of Superlattices and Microstructures, Institute of Semiconductors, Chinese Academy of Sciences, Beijing 100083, China.

<sup>d</sup> State Key Laboratory for Infrared Physics, Shanghai Institute of Technical Physics, Chinese Academy of Sciences, Shanghai 200083, China

Fig. S1a and S1d shows the bright-field TEM images of typical InAs  $\langle 00\bar{1} \rangle$  nanowires. Fig. S1b, S1c, S1e and S1f shows their corresponding HRTEM images and SAED patterns, respectively, indicating that our  $\langle 00\bar{1} \rangle$  nanowires have high crystal quality.

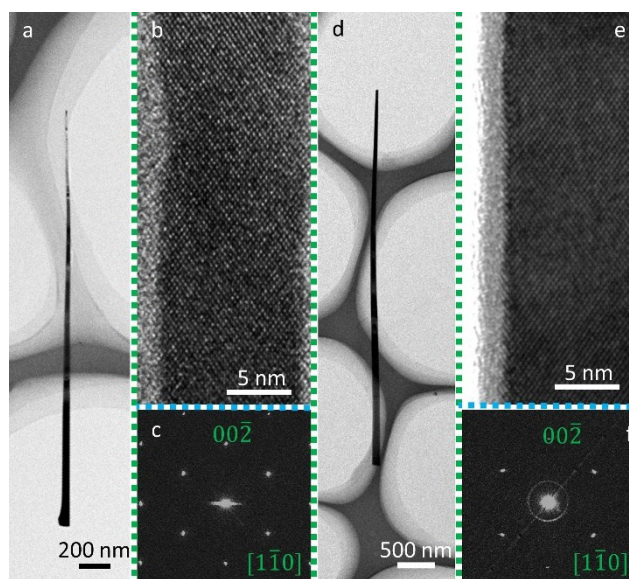

**Fig. S1** TEM investigations on typical InAs  $\langle 00\bar{1} \rangle$  nanowires. (a, d) BF TEM images of typical InAs  $\langle 00\bar{1} \rangle$  nanowires. (b, e) their corresponding HRTEM images and (c, f) SAED patterns taken along the  $[1\bar{1}0]$  zone-axes.

Fig. S2 shows the heating procedure of the *in situ* TEM heating experiments performed on InAs  $\langle 00\bar{1} \rangle$  nanowires.

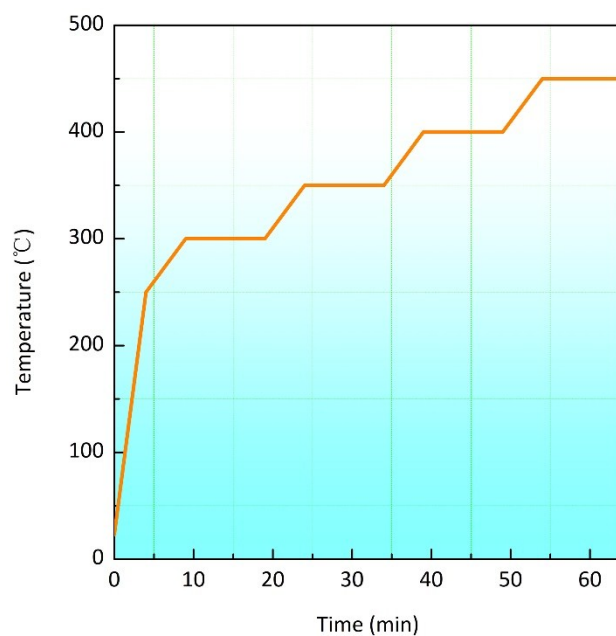

**Fig. S2** The heating procedure of the *in situ* heating experiments.
