# Supplementary figures and images for: In situ TEM observation of the vapor–solid–solid growth of <001> InAs nanowires
Source: Royal Society of Chemistry journal article supplement (doi:10.1039/d0nr02892d), 2020-01-01

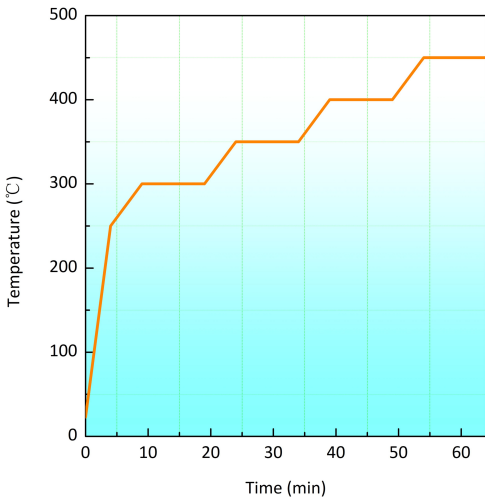

Supplement: d0nr02892d4.pdf [file d0nr02892d4.pdf]
